# Supplementary material for: Calcium/calmodulin inhibition of the Arabidopsis BRASSINOSTEROID-INSENSITIVE 1 receptor kinase provides a possible link between calcium and brassinosteroid signalling
Source: PubMed Central journal article supplement — Biochem J. 2012 Mar 27;443(Pt 2):515–23. doi: 10.1042/BJ20111871 (PMC3316158; doi:10.1042/bj20111871), 2012-03-27
Supplement: bj4430515add.pdf [file bj4430515add.pdf]

SUPPLEMENTARY ONLINE DATA

**Calcium/calmodulin inhibition of the *Arabidopsis* BRASSINOSTEROID-INSENSITIVE 1 receptor kinase provides a possible link between calcium and brassinosteroid signalling**

Man-Ho OH\*, Hyoung Seok KIM\*, Xia WU\*, Steven D. CLOUSE†, Raymond E. ZIELINSKI\* and Steven C. HUBER\*‡<sup>1</sup>

\*Department of Plant Biology, University of Illinois, Urbana, IL 61801, U.S.A., †Department of Horticultural Science, NC State University, Raleigh, NC 27695, U.S.A., and ‡U.S. Department of Agriculture, Agricultural Research Service, Urbana, IL 61801, U.S.A.

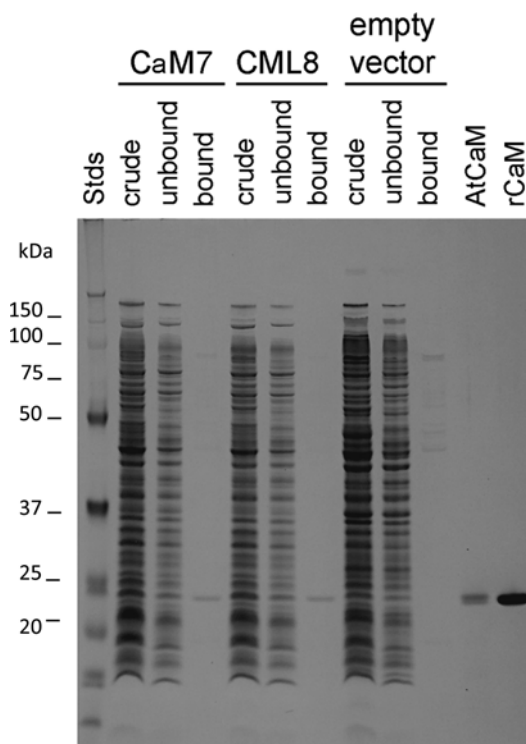

**Figure S1** Constitutive expression of CaM in *E. coli* driven by pRZ528 (CaM7) and 529 (CML8)

Total soluble proteins were extracted from late-exponential-phase bacteria, clarified by centrifugation and subjected to Ca<sup>2+</sup>-dependent HIC (hydrophobic interaction chromatography) on phenyl-Sepharose. Samples of the crude extract, the fraction that did not bind to phenyl-Sepharose (unbound), and the fraction that eluted from the resin in the presence of EDTA (bound) were separated by SDS/PAGE and stained with Coomassie Brilliant Blue. Purified AtCaM and recombinant CaM (rCaM) were fractionated in parallel as positive controls together with molecular mass standards (Stds, sizes given in kDa).

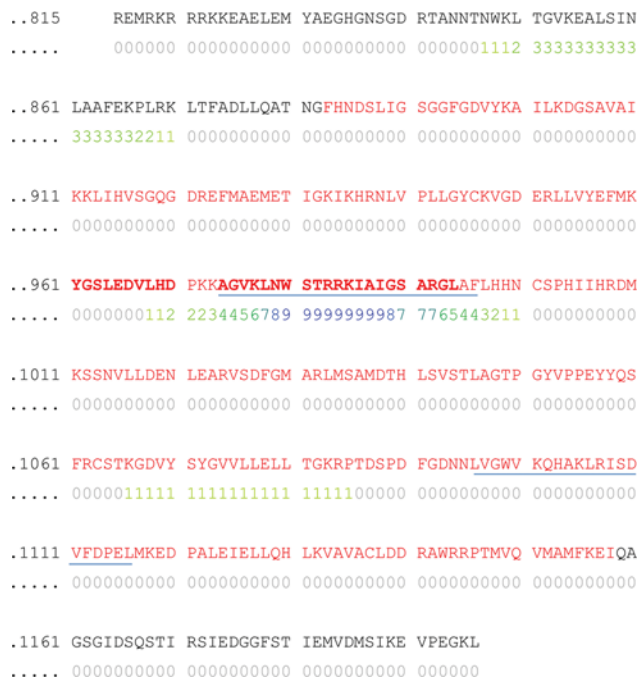

**Figure S2** BRI1 cytoplasmic domain sequence showing predicted probabilities of CaM binding

The numbers below the sequence indicate the probability of CaM binding (<http://calcium.uhnres.utoronto.ca/ctdb/ctdb/home.html>) with 9 being the highest score. The kinase domain of BRI1 is shown in red, and the sequences used to generate the W980 and W1099 peptides are underlined.

<sup>1</sup> To whom correspondence should be addressed (email schuber1@illinois.edu).

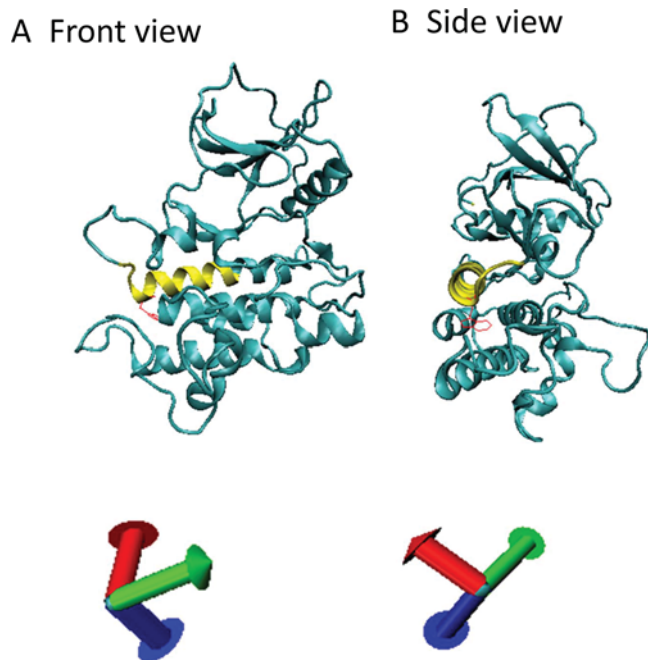

**Figure S3 Model of the BRI1 kinase domain structure**

The BRI1 kinase domain was modelled as described in the Experimental section of the main text. The location of the predicted CaM-binding site (Leu<sup>978</sup>–Arg<sup>992</sup>) is shown in yellow and the Try<sup>960</sup> side chain is shown in red. **(A)** Front view. **(B)** Side view.

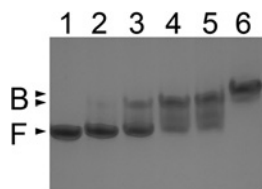

**Figure S4 Gel mobility-shift analysis of AtCaM6 interaction with W980 peptide**

AtCaM6 (300 pmol/reaction) was incubated with 0 (lane 1), 150 (lane 2), 300 (lane 3), 600 (lane 4) or 1200 (lane 5) pmol of W980 peptide or 300 pmol of a CaM-binding peptide from CaMKII (lane 6) then fractionated in a non-denaturing gel containing  $\text{Ca}^{2+}$ . Coomassie Brilliant Blue staining revealed the migration of free (F) and peptide-bound (B) AtCaM6. The larger size of the CaMKII peptide resulted in a slower mobility of the peptide–AtCaM6 complex compared with the W980 peptide complex.

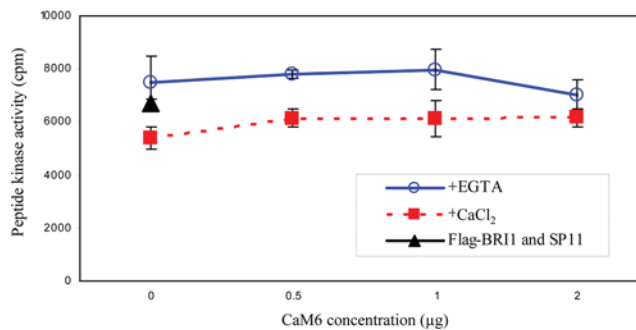

**Figure S5 AtCaM6 has no effect on BRI1 peptide kinase activity *in vitro***

BRI1 peptide kinase activity was assayed using [<sup>32</sup>P]ATP and the SP11 synthetic peptide as substrate as described in [1] with the addition of 0.1 mM  $\text{CaCl}_2$  or 1 mM EGTA as indicated. Each reaction contained 0.5 µg of FLAG–BRI1 protein, and reactions were run for 5 min.

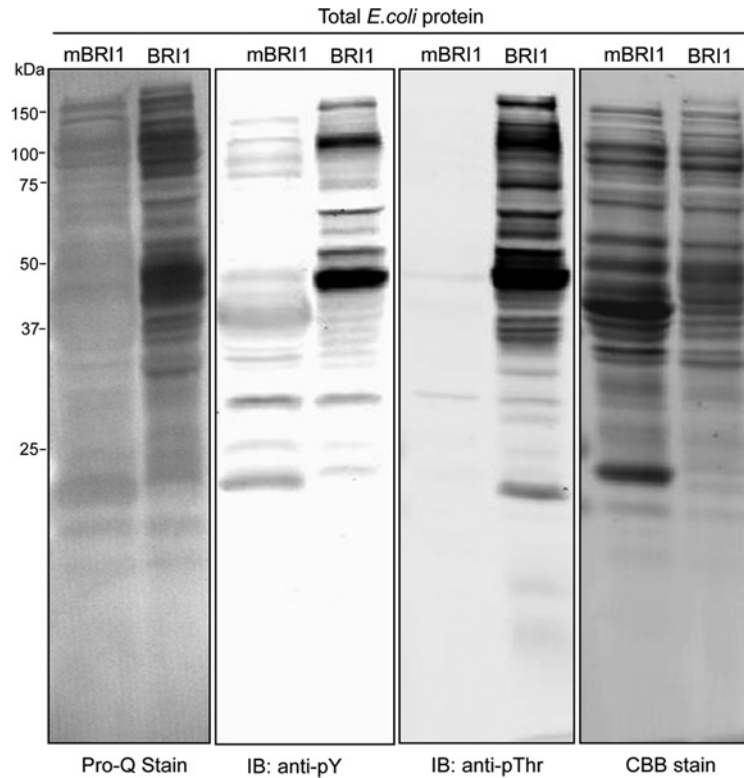

**Figure S6 Kinase-inactive mBRI1 does not transphosphorylate *E. coli* proteins**

BRI1 or the kinase-inactive mBRI1 (mutant BRI1) were expressed in *E. coli* and following purification of the FLAG-tagged proteins, the remaining *E. coli* proteins were analysed for phosphorylation by Pro-Q Diamond phosphoprotein staining or immunoblotting (IB) with generic anti-phosphotyrosine or anti-phosphothreonine antibodies. Molecular masses are indicated in kDa.

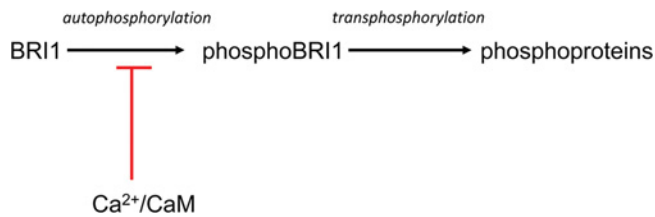

**Figure S7 Working model for effects of Ca<sup>2+</sup>/CaM on BRI1**

We propose that Ca<sup>2+</sup>/CaM inhibits BRI1 autophosphorylation, which then affects transphosphorylation activity. Thus certain CaM and CML isoforms inhibit BRI1 autophosphorylation when co-expressed in *E. coli* and, as a result, also inhibit the transphosphorylation of *E. coli* proteins. This provides a plausible explanation for why Ca<sup>2+</sup>/CaM inhibits transphosphorylation in the *in situ* system, but does not affect transphosphorylation activity *in vitro* (peptide kinase activity). The model predicts that Ca<sup>2+</sup> signalling during early stages of BRI1 activation will attenuate downstream signal transduction.



Table S1 Continued

| Source           | Site                                   | Name | $M_r$ (expt) | $M_r$ (calc) | Delta   | MC | Score | Expect                | Peptide                                  |
|------------------|----------------------------------------|------|--------------|--------------|---------|----|-------|-----------------------|------------------------------------------|
| TiO <sub>2</sub> | Thr <sup>3</sup>                       | gatZ | 911.2322     | 911.4663     | -0.2341 | 1  | 46    | 0.0025                | -MK <b>p</b> TLIAR.H                     |
| TiO <sub>2</sub> | Ser <sup>476</sup>                     | aspA | 1106.1322    | 1106.3917    | -0.2595 | 1  | 45    | 0.0017                | K.RYTDE <b>p</b> SEQ.-                   |
| TiO <sub>2</sub> | Thr <sup>626</sup> /Thr <sup>630</sup> | pnp  | 1082.1788    | 1082.4563    | -0.2774 | 1  | 36    | 0.0098                | R.VY <b>p</b> TGKV <b>p</b> TR.I         |
| TiO <sub>2</sub> | Ser <sup>3</sup> /Thr <sup>8</sup>     | gatD | 1592.2680    | 1592.6671    | -0.3990 | 1  | 41    | 0.00036               | -MK <b>p</b> SVVND <b>p</b> TDGIVR.V     |
| TiO <sub>2</sub> | Thr <sup>87</sup> /Thr <sup>97</sup>   | sucB | 1878.3088    | 1878.7761    | -0.4673 | 2  | 40    | 0.0014                | K.E <b>p</b> TSAKSEEKAS <b>p</b> TPAQR.Q |
| TiO <sub>2</sub> | Ser <sup>75</sup>                      | frr  | 927.1428     | 927.3773     | -0.2344 | 0  | 39    | 0.0078                | R.SM <b>p</b> SPAVEK.A                   |
| TiO <sub>2</sub> | Ser <sup>2</sup>                       | lipA | 1038.2284    | 1038.4933    | -0.2648 | 0  | 30    | 0.019                 | M. <b>p</b> SKPIVMER.G                   |
| IMAC             | Thr <sup>6</sup>                       | yqjD | 1316.2666    | 1316.5874    | -0.3208 | 1  | 54    | $5.00 \times 10^{-5}$ | M.SKEH <b>p</b> TTEHLR.A                 |
| IMAC             | Thr <sup>7</sup>                       | yqjD | 1316.2684    | 1316.5874    | -0.3190 | 1  | 33    | 0.0047                | M.SKEH <b>p</b> TTEHLR.A                 |
| IMAC             | Thr <sup>6</sup> /Thr <sup>7</sup>     | yqjD | 1396.2338    | 1396.5537    | -0.3199 | 1  | 67    | $5.80 \times 10^{-6}$ | M.SKEH <b>p</b> T <b>p</b> TTEHLR.A      |
| IMAC             | Thr <sup>17</sup>                      | espF | 921.2758     | 921.4069     | -0.1311 | 0  | 29    | 0.026                 | R.H <b>p</b> TSASR.V                     |
| IMAC             | Thr <sup>76</sup>                      | grpE | 1238.3146    | 1238.6020    | -0.2873 | 2  | 28    | 0.039                 | R.RR <b>p</b> TELDIEK.A                  |
| IMAC             | Thr <sup>94</sup>                      | tufA | 2736.8350    | 2737.2639    | -0.4289 | 0  | 25    | 0.024                 | K.NM <b>p</b> TGAAGMDGAILVVAATDGPMPQTR.E |
| P-bodies         | Thr <sup>176</sup> /Ser <sup>180</sup> | ahpC | 1658.2694    | 1658.7205    | -0.4511 | 0  | 35    | 0.0025                | K.EGE <b>p</b> TL <b>p</b> PSLDLVGK.I    |

## REFERENCE

- Oh, M.-H., Ray, W. K., Huber, S. C., Asara, J. M., Gage, D. A. and Clouse, S. D. (2000) Recombinant brassinosteroid insensitive 1 receptor-like kinase autophosphorylates on serine and threonine residues and phosphorylates a conserved peptide motif *in vitro*. *Plant Physiol.* **124**, 751–766

Received 19 October 2011/30 January 2012; accepted 7 February 2012  
 Published as BJ Immediate Publication 7 February 2012, doi:10.1042/BJ20111871
